# Supplementary material for: Carbon/TiO2/Fe2O3 hybrid shells as efficient visible light photocatalysts
Source: Royal Society of Chemistry journal article supplement (doi:10.1039/c9nj01742a), 2019-01-01
Supplement: c9nj01742a1.pdf [file c9nj01742a1.pdf]

## **Carbon/TiO<sub>2</sub>/Fe<sub>2</sub>O<sub>3</sub> Hybrid Shells toward Efficient Visible Light Photocatalysts**

Minggui Wang<sup>a,b</sup>, Jie Han<sup>b\*</sup>, Ganyin Yuan<sup>b</sup>, Rong Guo<sup>b</sup>

<sup>a</sup> Guangling College, Yangzhou University, Yangzhou, Jiangsu, 225002, P. R. China

<sup>b</sup> School of Chemistry and Chemical Engineering, Yangzhou University, Yangzhou,  
Jiangsu, 225002, P. R. China. *E-mail address*: hanjie@yzu.edu.cn

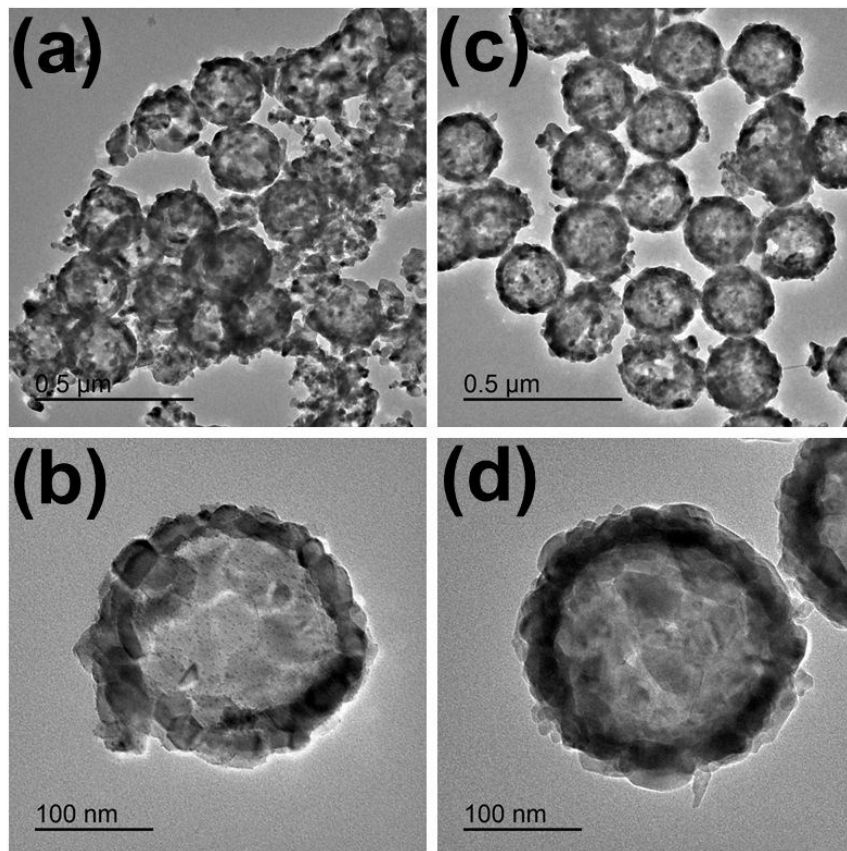

**Figure S1** TEM images of (a, b)  $\text{TiO}_2$  hollow spheres and (c, d)  $\text{TiO}_2/\text{Fe}_2\text{O}_3$  hollow hybrids calcined at 600 °C in air.

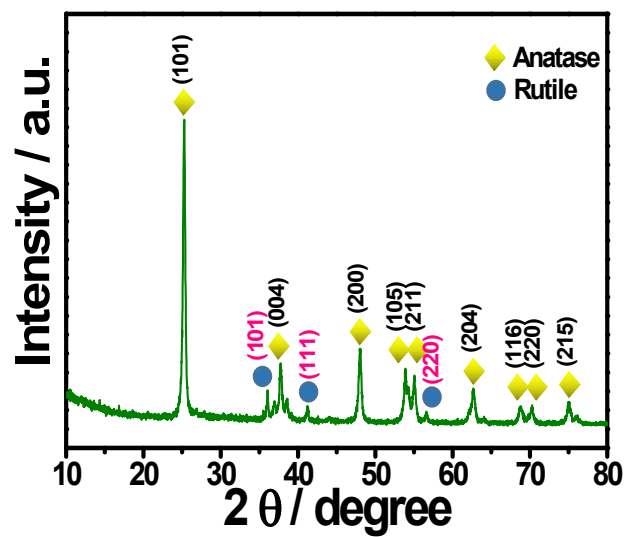

Figure S2 XRD pattern of TiO<sub>2</sub> hollow spheres.

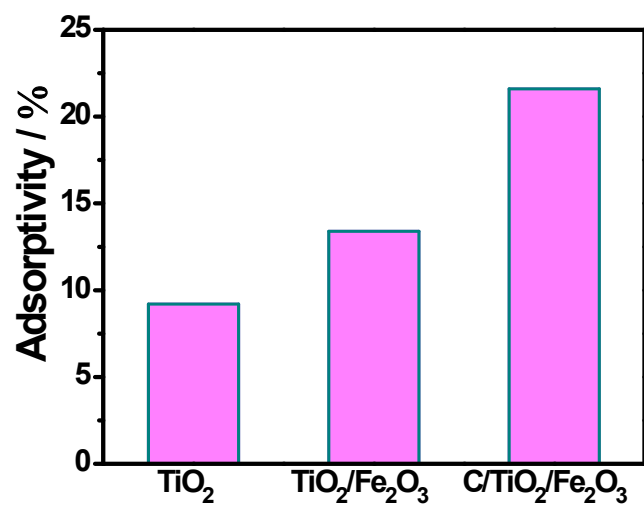

**Figure S3** Bar plot showing the adsorption of RhB with different photocatalysts.

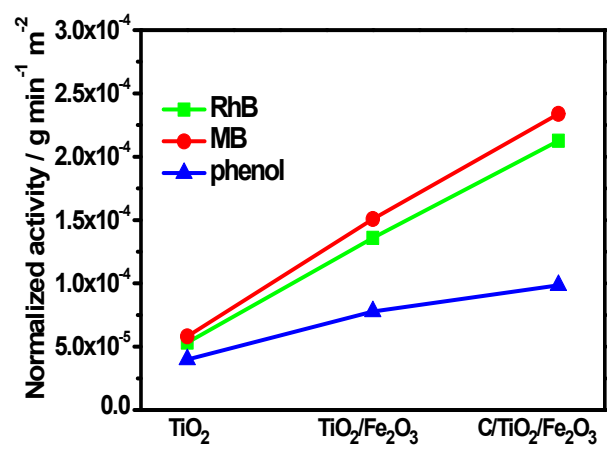

Figure S4 The photocatalytic activity normalized with the specific surface area.

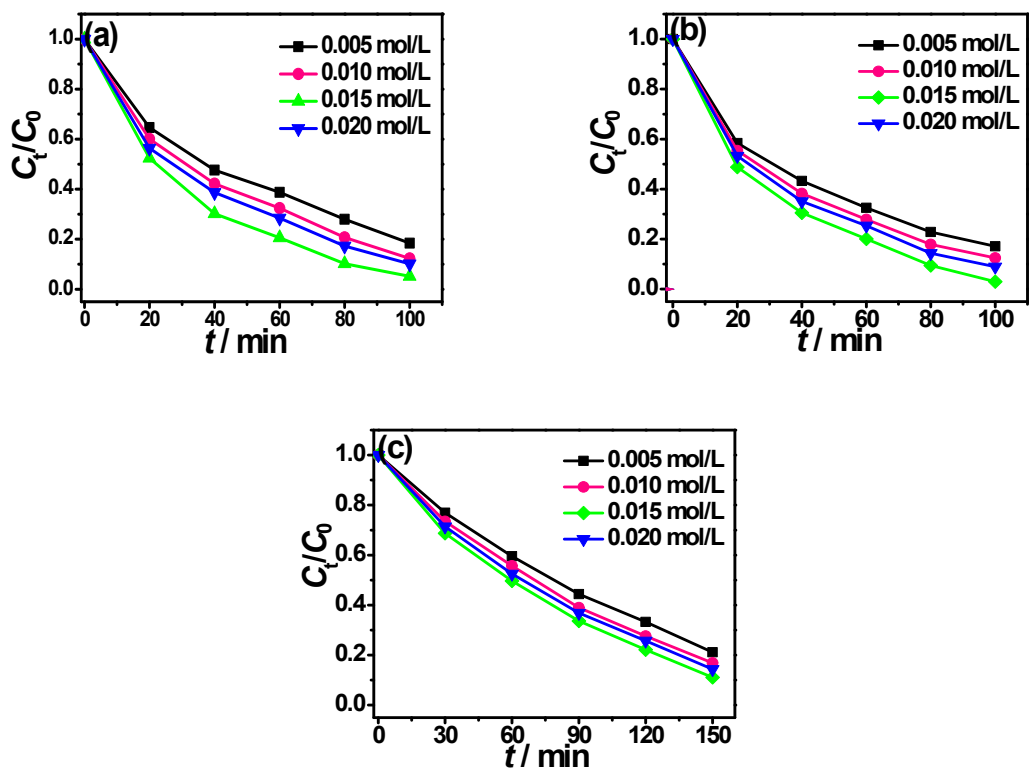

**Figure S5** The photocatalytic activity under visible light irradiation of (a) RhB, (b) MB and (c) phenol using C/TiO<sub>2</sub>/Fe<sub>2</sub>O<sub>3</sub> hollow hybrids synthesized at different FeCl<sub>3</sub>·6H<sub>2</sub>O precursor concentration.

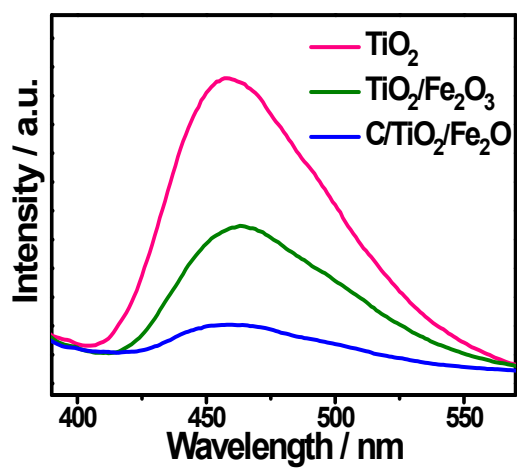

**Figure S6** PL spectra of TiO<sub>2</sub> and TiO<sub>2</sub>/Fe<sub>2</sub>O<sub>3</sub>, C/TiO<sub>2</sub>/Fe<sub>2</sub>O<sub>3</sub> hollow hybrids excited at 360 nm.

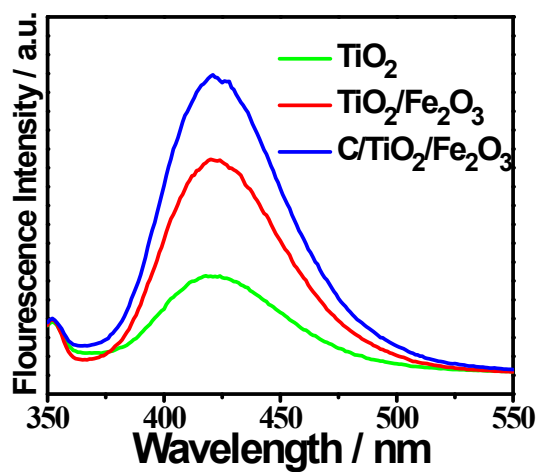

**Figure S7** Fluorescence spectra of C/TiO<sub>2</sub>/Fe<sub>2</sub>O<sub>3</sub> hollow hybrids in a  $5 \times 10^{-4}$  mol L<sup>-1</sup> basic solution of terephthalic acid under visible light irradiation at a fixed 30 min.

**Table S1** Comparison of the photocatalytic activity of different C/TiO<sub>2</sub>/Fe<sub>2</sub>O<sub>3</sub> photocatalysts.

| sample                                                                                                         | $k$ (min <sup>-1</sup> ) | irradiation   | organic dye  | ref       |
|----------------------------------------------------------------------------------------------------------------|--------------------------|---------------|--------------|-----------|
| TiO <sub>2</sub> /Fe <sub>2</sub> O <sub>3</sub> /CNTs                                                         | 0.0211                   | visible light | tetracycline | 1         |
| TiO <sub>2</sub> & $\gamma$ -Fe <sub>2</sub> O <sub>3</sub> @GO                                                | 0.00200                  | visible light | RhB          | 2         |
| Fe <sub>2</sub> O <sub>3</sub> -Fe <sub>3</sub> O <sub>4</sub> @SiO <sub>2</sub> @TiO <sub>2</sub> -<br>TNS-GR | 0.0201                   | visible light | RhB          | 3         |
| Fe <sub>2</sub> O <sub>3</sub> -TiO <sub>2</sub> -graphene                                                     | 0.0176                   | visible light | RhB          | 4         |
| C/TiO <sub>2</sub> /Fe <sub>2</sub> O <sub>3</sub> hollow<br>hybrids                                           | 0.0289                   | visible light | RhB          | this work |

## References

1. C. Y. Lu, W. S. Guan, G. H. Zhang, L. J. Ye, Y. Zhou and X. Zhang, *Micro Nano Lett.*, 2013, **8**, 749-752.
2. M. Ghavami, M. Z. Kassaee, R. Mohammadi, M. Koochi and B. N. Haerizadeh, *Solid State Sci.*, 2014, **38**, 143-149.
3. W. Q. Yang and X. W. Liu, *Funct. Mater. Lett.*, 2018, DOI: 10.1142/S1793604719500061.
4. J. J. Zhang, P. Qi, J. Li, X. C. Zheng, P. Liu, X. X. Guan, G. P. Zheng, *J. Ind. Eng. Chem.*, 2018, **61**, 407-415.
